# Supplementary material
Source: Springer Nature journal article supplement (http://www.nature.com/nsmb/journal/v19/n2/extref/nsmb0212-264-S1.pdf)
Supplement: nsmb0212-264-S1.pdf [file nsmb0212-264-S1.pdf]

## Supplementary material

### Corrigendum: A single amino acid residue can determine sensitivity of SERCAs to artemisinins

Anne-Catrin Uhlemann, Angus Cameron, Ursula Eckstein-Ludwig, Jorge Fischbarg, Pavel Iserovich, Felipe A. Zuniga, Malcolm East, Anthony Lee, Leo Brady, Richard K. Haynes, Sanjeev Krishna

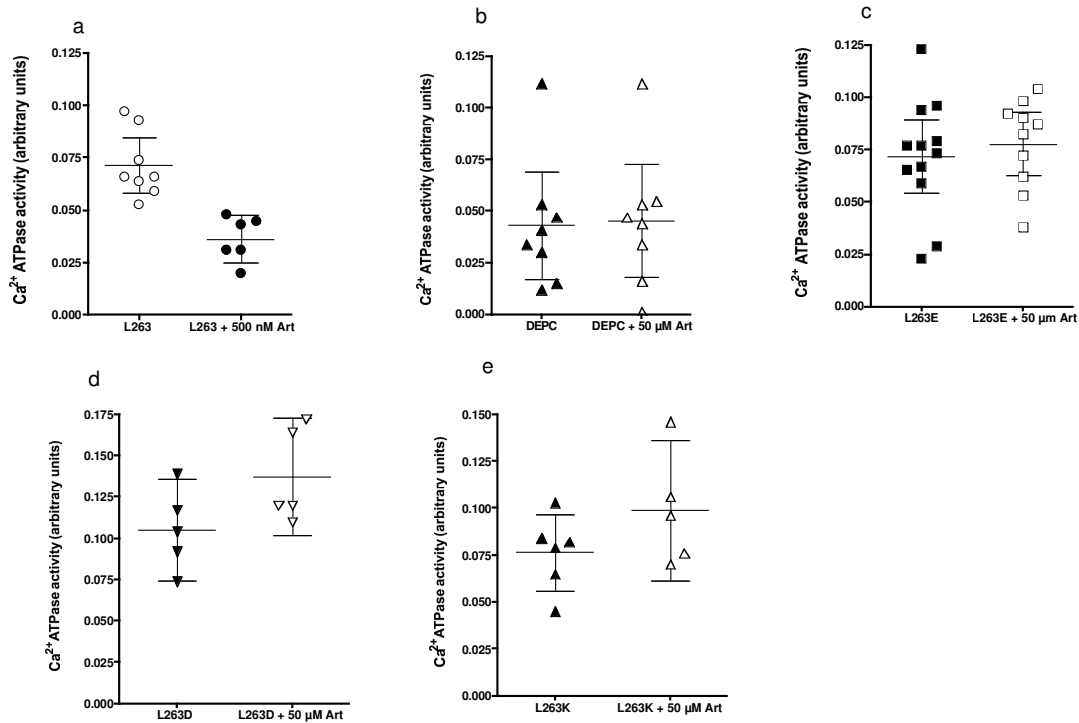

**Supplementary Figure 1.**  $\text{Ca}^{2+}$ -ATPase activities of control and artemisinin-resistant mutants of PfATP6 assayed in *Xenopus laevis* oocyte membranes. **(a)** Activity of wild-type PfATP6 without and with artemisinin (Art, 500 nM).  $\text{Ca}^{2+}$ -ATPase activity is inhibited by 500 nM artemisinin (mean  $\pm$  s.e.m of  $0.072 \pm 0.0056$  to  $0.036 \pm 0.0044$ ;  $p = 0.0005$ , giving a mean difference value (95% CI for difference) of  $0.0352$  ( $0.019$  to  $0.052$ ). **(b)** Activity of membrane preparations from oocytes injected with water (endogenous  $\text{Ca}^{2+}$ -ATPase activity) without and with artemisinin ( $50 \mu\text{M}$ ); no inhibition of basal  $\text{Ca}^{2+}$ -ATPase activity by artemisinins (control mean  $\pm$  SEM =  $0.043 \pm 0.01$  compared with  $0.045 \pm 0.02$  Units;  $P = 0.89$ ). **(c)** Activity of an L263E mutation without and with artemisinin ( $50 \mu\text{M}$ ), showing no inhibition of activity even in the presence of  $50 \mu\text{M}$  artemisinin (mean  $\pm$  SEM =  $0.072 \pm 0.008$  compared with  $0.07 \pm 0.0079$ ;  $p = 0.58$ ). **(d)** Activity of an L263D mutant without and with artemisinin ( $50 \mu\text{M}$ ); mean  $\pm$  s.e.m.  $\text{Ca}^{2+}$ -ATPase activity before and after artemisinin are  $0.11 \pm 0.01$  and  $0.14 \pm 0.013$  ( $P = 0.094$ ). **(e)** activity of an L263K mutant without and with artemisinin ( $50 \mu\text{M}$ ), mean  $\pm$  SEM  $\text{Ca}^{2+}$ -ATPase activity before and after artemisinin are  $0.076 \pm 0.008$  and  $0.099 \pm 0.014$  ( $P = 0.17$ ). Data in **(b)** were not presented in the original paper. Data from **(d-e)** are from one representative experiment, whereas results from more than one experiment were reported previously.

**Supplementary Figure 2.** Inhibition curves of PfATP6 and mutants with artemisinin or artemisone; the original data were reanalyzed with inclusion of some data and standard analytical procedure (see Suppl Methods). Results from independent experiments are shown in each graph, displayed as  $\text{Ca}^{2+}$ -ATPase activity in the presence of an artemisinin inhibitor, normalised with respect to values that are obtained without presence of inhibitor.

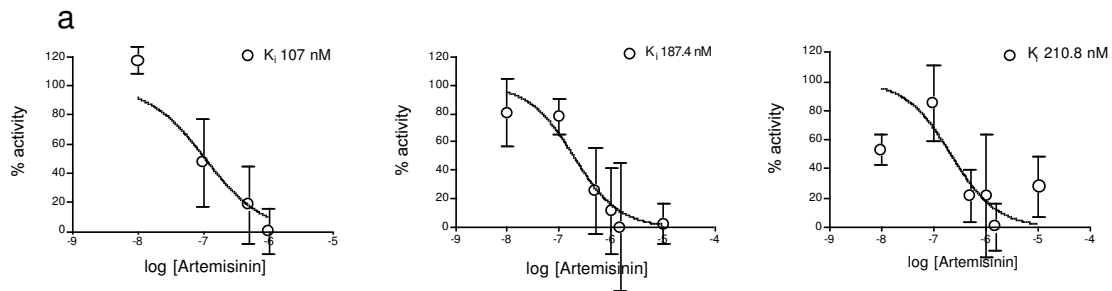

**(a)** Inhibition of PfATP6  $\text{Ca}^{2+}$ -ATPase activity by artemisinin with data from 3 independent experiments.

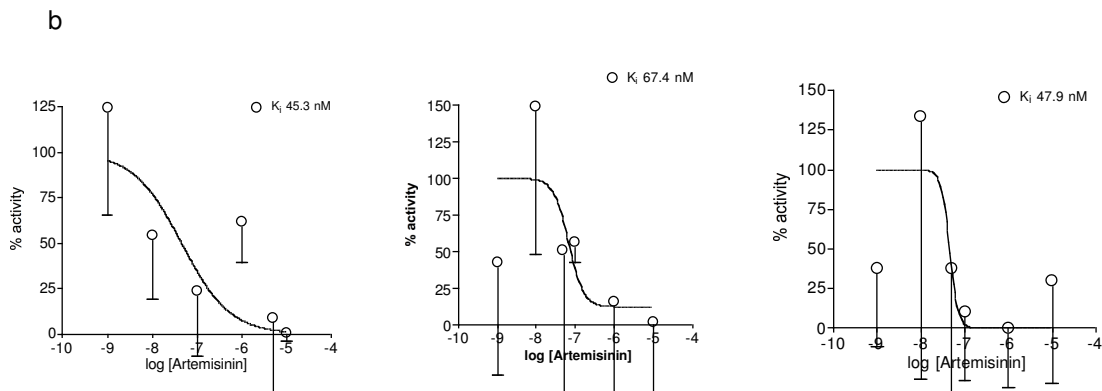

**(b)** Inhibition of PfATP6L263A by artemisinin, with inclusion of 2 possible outlying values (at 1nM). Results from 3 experiments are presented here (4 experiments were analyzed in the original paper).

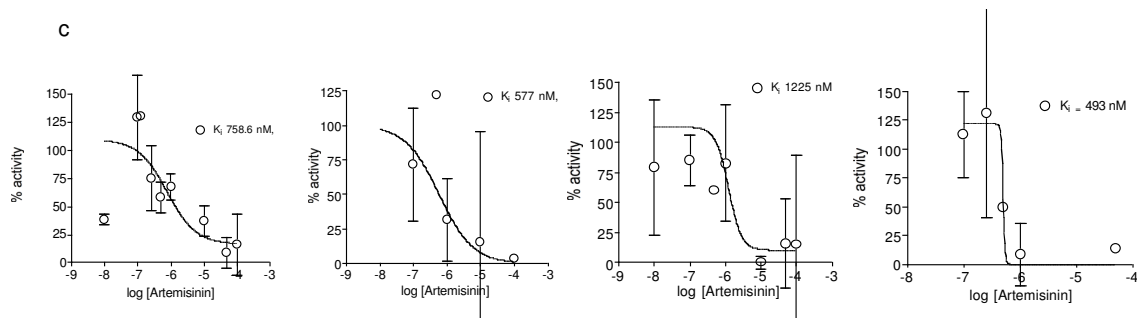

**(c)** Inhibition of PfATP6L263S by artemisinin, with inclusion of possible outlying values. Only the second graph was modelled with constraints.

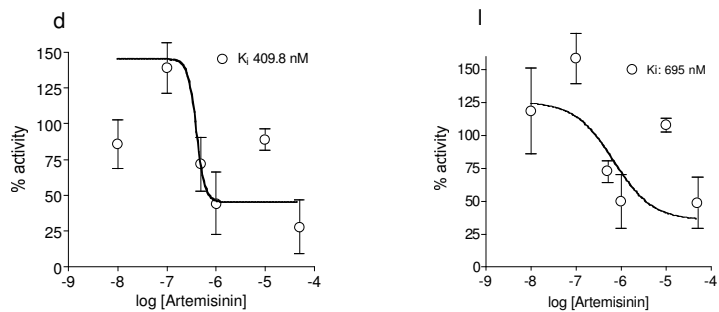

**(d)** Inhibition of PfATP6 L263Q by artemisinin. For modelling, constraints were 120 for Top and 40 for Bottom because of incomplete inhibition at high concentrations.

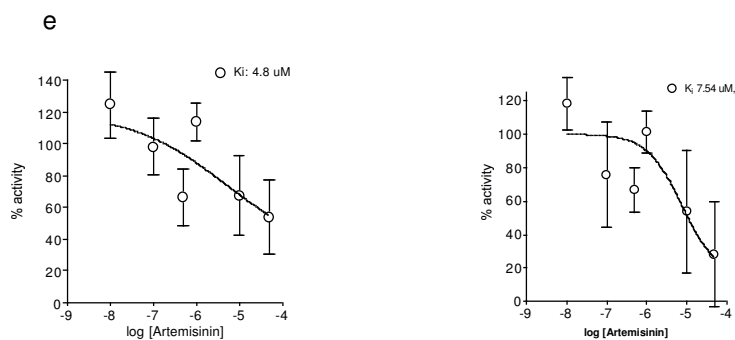

**(e)** Inhibition of F264L PfATP6 by artemisinin. Data could not be retrieved for one experiment. For modelling, constraints were 100 for Top and 15 for Bottom because of incomplete inhibition at high concentrations.

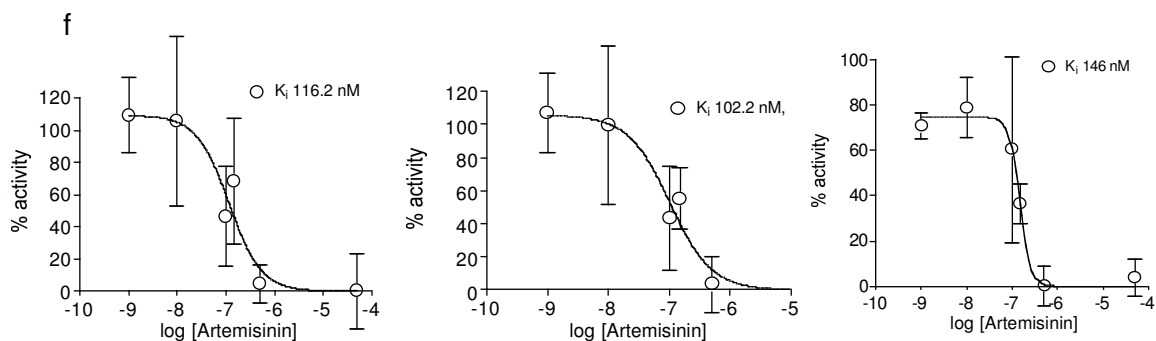

**(f)** Inhibition of PfATP6 I89T by artemisinin modelled without constraint for Top.

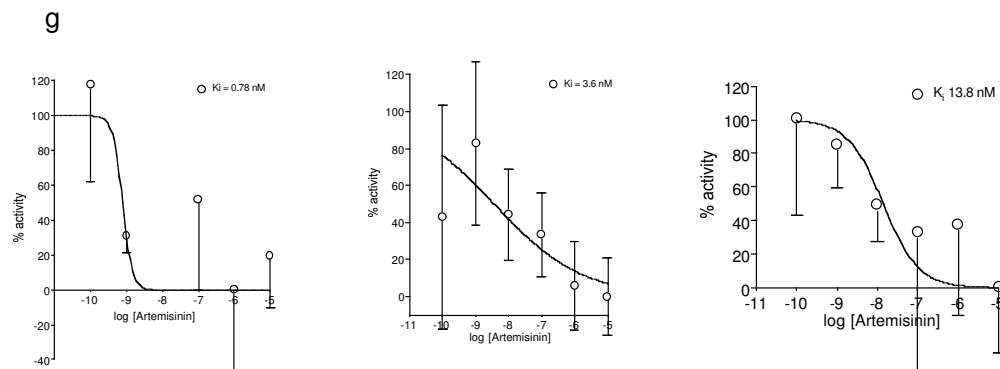

**(g)** Inhibition of PvSERCA by artemisinin. Analysis includes possible outlying values and correction of 2 incorrect values compared with previously reported results.

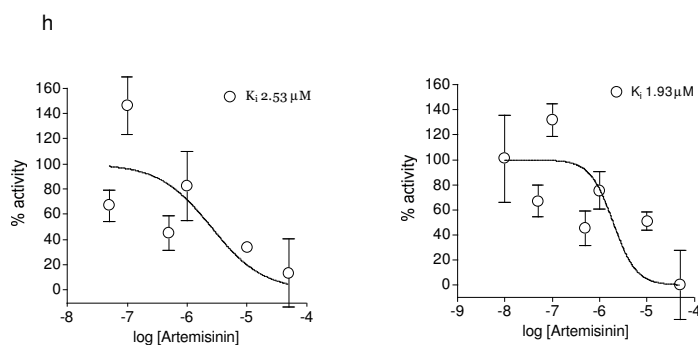

**(h)** Inhibition of PbSERCA by artemisinin. One set of experiments could not be modelled after reanalysis.

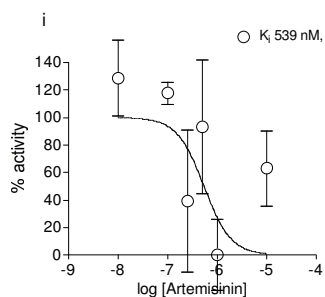

**(i)** Inhibition of SERCA1 E255L mutant by artemisinin. One set of data could not be retrieved, and one could not be reanalyzed.

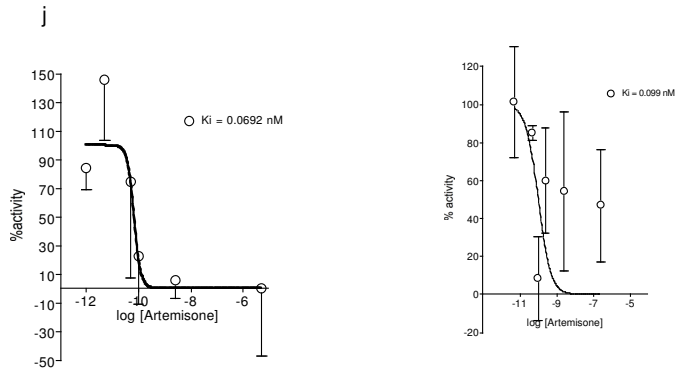

(j) Inhibition of PvSERCA by artemisone. One set of data could not be retrieved.

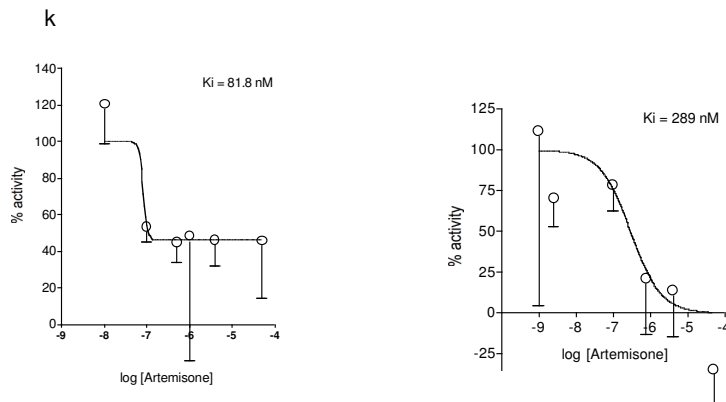

(k) Inhibition of PbSERCA by artemisone. One set of data could not be reanalyzed.

### Supplementary Methods

Inhibitory constants were derived in Prism (v4.0a, GraphPad Software, Inc.) using a sigmoidal dose-response equation ( $Y = \text{Bottom} + (\text{Top} - \text{Bottom}) / (1 + 10^{-(\text{LogEC50} - X) \cdot \text{HillSlope}})$ ), where X is the logarithm of the concentration of the inhibitor and Y is the normalised activity of the  $\text{Ca}^{2+}$ -ATPase activity being assayed. Constraints are 100 for Top and 0 for Bottom unless indicated.

# Supplementary Table

| <b>PfATP6 wild type</b> |           |           |           | <b>Experiment 1</b> |           |          |  | <b>Experiment 2</b> |           |           |           | <b>Experiment 3</b> |           |            |           | <b>Experiment 4</b> |           |           |           |            |  |  |  |
|-------------------------|-----------|-----------|-----------|---------------------|-----------|----------|--|---------------------|-----------|-----------|-----------|---------------------|-----------|------------|-----------|---------------------|-----------|-----------|-----------|------------|--|--|--|
| Log [Artemisinin]       |           |           |           | % Activity          |           |          |  | Log [Artemisinin]   |           |           |           | % Activity          |           |            |           | Log [Artemisinin]   |           |           |           | % Activity |  |  |  |
| -8                      | 101.1407  | 117.1103  | 133.0798  |                     |           |          |  | -8                  | 32.87671  | 106.8493  | 101.3699  | -8                  | 49.65035  | 37.06294   | 72.72727  |                     |           |           |           |            |  |  |  |
| -7                      | 64.65753  | -10.9589  | 87.67123  |                     |           |          |  | -7                  | 90.41096  | 90.41096  | 52.05479  | -7                  | 85.14851  | 129.703    | 40.59406  |                     |           |           |           |            |  |  |  |
| -6.30103                | -35.61644 | 43.28767  | 46.57534  |                     |           |          |  | -6.30103            | 52.05479  | 60.27397  | -35.61644 | -6.30103            | -1.069519 | 56.68449   | 8.556149  |                     |           |           |           |            |  |  |  |
| -6                      | 21.29278  | -31.17871 | 9.885932  |                     |           |          |  | -6                  | 16.43836  | -43.83562 | 60.27397  | -6                  | -30.69307 | -9.90099   | 105.9406  |                     |           |           |           |            |  |  |  |
|                         |           |           |           |                     |           |          |  | -5.823909           | 86.66666  | -66.66666 | -20       | -5.823909           | 14.97326  | -33.15508  | 18.18182  |                     |           |           |           |            |  |  |  |
|                         |           |           |           |                     |           |          |  | -5                  | 26.66667  | 3.333333  | -23.33333 | -5                  | 53.84615  | -13.28671  | 43.35664  |                     |           |           |           |            |  |  |  |
| <b>PfATP6 L263A</b>     |           |           |           | <b>Experiment 1</b> |           |          |  | <b>Experiment 2</b> |           |           |           | <b>Experiment 3</b> |           |            |           | <b>Experiment 4</b> |           |           |           |            |  |  |  |
| Log [Artemisinin]       |           |           |           | % Activity          |           |          |  | Log [Artemisinin]   |           |           |           | % Activity          |           |            |           | Log [Artemisinin]   |           |           |           | % Activity |  |  |  |
| -9                      | 236.9758  | 39.54699  | 96.93909  |                     |           |          |  | -9                  | -93.07    | 174.2574  | 45.54456  | -9                  | 31.90633  | 126.6453   | -45.07    |                     |           |           |           |            |  |  |  |
| -8                      | 124.6914  | 20.98765  | 17.69547  |                     |           |          |  | -8                  | 290.266   | 201.7699  | -46.018   | -8                  | 121.3382  | -146.9136  | 426.17    |                     |           |           |           |            |  |  |  |
| -7                      | 59.66263  | -47.90368 | 59.66263  |                     |           |          |  | -7.30103            | -120      | -8        | 280       | -7.30103            | -197.4    | 171.832    | 138.266   |                     |           |           |           |            |  |  |  |
| -6                      | 122.1916  | 16.59014  | 41.84267  | 67.42081            |           |          |  | -7                  | 56        | 32        | 80        | -7                  | -36.27911 | -29.56585  | 97.98602  |                     |           |           |           |            |  |  |  |
| -5.30103                | 79.22015  | -82.12933 | 30.32637  |                     |           |          |  | -6                  | -102.97   | 114.8515  | 35.64357  | -6                  | 31.90633  | 43.7487    | -74.67507 |                     |           |           |           |            |  |  |  |
| -5                      | 4.526749  | 6.17284   | -8.641975 |                     |           |          |  | -5                  | -37.16814 | -143.3628 | 184.0708  | -5                  | 5.50221   | 151.8214   | -67.65737 |                     |           |           |           |            |  |  |  |
| <b>PfATP6 L263S</b>     |           |           |           | <b>Experiment 1</b> |           |          |  | <b>Experiment 2</b> |           |           |           | <b>Experiment 3</b> |           |            |           | <b>Experiment 4</b> |           |           |           |            |  |  |  |
| Log [Artemisinin]       |           |           |           | % Activity          |           |          |  | Log [Artemisinin]   |           |           |           | % Activity          |           |            |           | Log [Artemisinin]   |           |           |           | % Activity |  |  |  |
| -8                      | 33.97293  | 43.186    |           |                     |           |          |  | -8                  | 157.0858  | 209.4144  | 247.4716  | -8                  | 124.3526  | -32.58652  | 145.9994  |                     |           |           |           |            |  |  |  |
| -7                      | 125.757   | 203.028   | 27.88041  | 161.8168            |           |          |  | -7                  | 96.62174  | 127.0261  | -8.104456 | -7                  | 125.5499  | 74.4501    | 55.86835  | -6.60206            | -25.64433 | 128.9948  | 290.0773  |            |  |  |  |
| -6.90309                | 130.3068  | 130.3068  |           |                     |           |          |  | -6.60206            | -133.0572 | 39.71545  | 63.82927  | -6.60206            | 192.2182  | 369.5609   | 57.43775  | -6.30103            |           | 49.25214  |           |            |  |  |  |
| -6.60206                | 9.952606  | 17.06161  | 162.7962  | 38.38863            | 60.36807  | 162.9448 |  | -6.30103            | 138.0572  | 171.3572  | 57.18567  | -6.30103            | 135.3321  | 24.28831   | 19.24086  | -6                  | 17.27941  | 49.44853  | -42.46323 |            |  |  |  |
| -6.30103                | 50.86357  | 79.52649  | 95.9053   | 46.76887            | 18.10596  |          |  | -6                  | -27.82916 | 53.37995  | 68.41868  | -6                  | 167.6462  | -0.1163514 | 81.05907  | -5                  |           | -90.07732 | 58.11856  |            |  |  |  |
| -6                      | 48.05195  | 67.53247  | 87.01299  |                     |           |          |  | -5                  | -100.9485 | 168.3225  | -20.56909 | -5                  | 0.1231041 | -9.16777   | 9.413979  | -4.30103            | -14.85043 | 86.6453   | -30.87607 |            |  |  |  |
| -5                      | 69.51219  | 18.29268  | 40.2439   | -3.658537           | 62.19512  |          |  | -4.30103            | -41.8871  | -18.23925 | -35.13057 | -4.30103            | 84.85766  | 4.098526   | -41.32849 |                     |           |           |           |            |  |  |  |
| -4.30103                | -24.97743 | -24.97743 | 39.82568  | -1.833465           | 12.05292  | 53.71206 |  | -4                  | 38.34123  | -42.86789 | 14.27927  | -4                  | -63.15528 | -56.06157  | 163.8434  |                     |           |           |           |            |  |  |  |
| -4                      | 76.08117  | 63.41825  | 4.324666  | 16.98758            | -80.09475 |          |  |                     |           |           |           |                     |           |            |           |                     |           |           |           |            |  |  |  |
| <b>PfATP6 L263Q</b>     |           |           |           | <b>Experiment 1</b> |           |          |  | <b>Experiment 2</b> |           |           |           | <b>Experiment 3</b> |           |            |           | <b>Experiment 4</b> |           |           |           |            |  |  |  |
| Log [Artemisinin]       |           |           |           | % Activity          |           |          |  | Log [Artemisinin]   |           |           |           | % Activity          |           |            |           | Log [Artemisinin]   |           |           |           | % Activity |  |  |  |
| -8                      | 73.35     | 64.46     | 119.55    |                     |           |          |  | -8                  | 92.58     | 79.38     | 183.31    |                     |           |            |           |                     |           |           |           |            |  |  |  |
| -7                      | 122.32    | 120.46    | 174.4     |                     |           |          |  | -7                  | 139.48    | 139.48    | 196.91    |                     |           |            |           |                     |           |           |           |            |  |  |  |
| -6.30103                | 66.69     | 41.9      | 106.97    |                     |           |          |  | -6.30103            | 56.81     | 77.38     | 84.23     |                     |           |            |           |                     |           |           |           |            |  |  |  |
| -6                      | 12.94     | 34.26     | 85.79     |                     |           |          |  | -6                  | 16.69     | 44.74     | 87.63     |                     |           |            |           |                     |           |           |           |            |  |  |  |
| -5                      | 79.54     | 103.72    | 83.26     |                     |           |          |  | -5                  | 98.21     | 108.97    | 116.15    |                     |           |            |           |                     |           |           |           |            |  |  |  |
| -4.30103                | 14        | 4.71      | 65.14     |                     |           |          |  | -4.30103            | 36.24     | 22.54     | 86.98     |                     |           |            |           |                     |           |           |           |            |  |  |  |
| <b>PfATP6 F264L</b>     |           |           |           | <b>Experiment 1</b> |           |          |  | <b>Experiment 2</b> |           |           |           | <b>Experiment 3</b> |           |            |           | <b>Experiment 4</b> |           |           |           |            |  |  |  |
| Log [Artemisinin]       |           |           |           | % Activity          |           |          |  | Log [Artemisinin]   |           |           |           | % Activity          |           |            |           | Log [Artemisinin]   |           |           |           | % Activity |  |  |  |
| -8                      | 83.24     | 148.99    | 142.55    |                     |           |          |  | -8                  | 87.39     | 136.41    | 130.81    |                     |           |            |           |                     |           |           |           |            |  |  |  |
| -7                      | 73.81     | 133.86    | 87.86     |                     |           |          |  | -7                  | 14.97     | 119.73    | 92.52     |                     |           |            |           |                     |           |           |           |            |  |  |  |
| -6.30103                | 101.44    | 55.36     | 42.4      |                     |           |          |  | -6.30103            | 93.03     | 58.94     | 48.09     |                     |           |            |           |                     |           |           |           |            |  |  |  |
| -6                      | 114.18    | 134.81    | 93.55     |                     |           |          |  | -6                  | 90.2      | 126.61    | 87.39     |                     |           |            |           |                     |           |           |           |            |  |  |  |
| -5                      | 117.28    | 42.4      | 42.4      |                     |           |          |  | -5                  | 127.11    | 9.36      | 24.85     |                     |           |            |           |                     |           |           |           |            |  |  |  |
| -4.30103                | 11.19     | 91.69     | 58.47     |                     |           |          |  | -4.30103            | -34.01    | 65.31     | 53.06     |                     |           |            |           |                     |           |           |           |            |  |  |  |

**PfATP6 I89T**

| Log [Artemisinin] | % Activity |          |          |          |
|-------------------|------------|----------|----------|----------|
| -9                | 188.7574   | 82.24852 | 135.503  | 76.33136 |
| -8                | 37.37236   | 4.697073 | 208.9176 | 257.9306 |
| -7                | 42.02898   | 46.48829 | 108.9186 | 100      |
| -6.823909         | 1.442308   | 181.7308 | 44.71154 | 44.71154 |
| -6.30103          | -31.86813  | 4.095904 | 40.05994 | 16.08392 |
| -4.30103          | 33.95087   | 38.78373 | -24.0435 | 33.95087 |

| Log [Artemisinin] | % Activity |          |           |          |
|-------------------|------------|----------|-----------|----------|
| -9                | 191.6943   | 91.12426 | 65.17856  | 61.87922 |
| -8                | 91.00367   | 151.4366 | -13.03862 | 253.5126 |
| -7                | 68.26408   | 20.66146 | 138.9998  | 42.21062 |
| -6.823909         | 84.4687    | 42.74481 | 49.81517  | 102.8575 |
| -6.30103          | -54.4497   | 45.85186 | 10.7245   | 22.63571 |
| -4.30103          | 51.88929   | 28.44377 | -41.76278 | 6.630866 |

| Log [Artemisinin] | % Activity |           |          |  |
|-------------------|------------|-----------|----------|--|
| -9                | 72.71925   | 59.88125  | 79.13825 |  |
| -8                | 81.79612   | 100       | 54.49029 |  |
| -7                | -9.01039   | 134.0658  | 55.71453 |  |
| -6.823909         | 21.11651   | 51.45631  | 36.28641 |  |
| -6.30103          | 14.83563   | -15.82354 | 1.209334 |  |
| -4.30103          | -4.308754  | 11.73875  |          |  |

**PvSERCA**

| Log [Artemisinin] | % Activity |           |           |  |
|-------------------|------------|-----------|-----------|--|
| -11               | 288.6647   | 128.7144  | 255.8783  |  |
| -10               | 95.89794   | 223.0618  | 34.36706  |  |
| -9                | 38.76926   | 11.55556  | 42.17097  |  |
| -7                | 155.1945   | -8.608564 | 9.196118  |  |
| -6                | 110.2051   | -83.69222 | -25.86318 |  |
| -5                | 80.41485   | -15.73044 | -5.047627 |  |

| Log [Artemisinin] | % Activity |           |           |  |
|-------------------|------------|-----------|-----------|--|
| -10               | 84.26966   | -76       | 120.2247  |  |
| -9                | 123.1088   | -5.42461  | 130.1825  |  |
| -8                | -3.83018   | 59.6216   | 76.92663  |  |
| -7                | 77.18587   | 20.15057  | 3.039982  |  |
| -6                | -17.98601  | 53.35437  | -17.98601 |  |
| -5                | 42.31657   | -21.13521 | -21.13521 |  |

| Log [Artemisinin] | % Activity |           |           |  |
|-------------------|------------|-----------|-----------|--|
| -10               | 207.077    | 7.863937  | 87.54918  |  |
| -9                | 71.91327   | 133.7041  | 49.44388  |  |
| -8                | 72.48212   | 69.42457  | 5.216168  |  |
| -7                | -17.0377   | 226.9984  | -111.6639 |  |
| -6                | 142.1301   | -37.62498 | 7.313785  |  |
| -5                | -43.70452  | 78.5972   | -34.53189 |  |

**PbSERCA**

| Log [Artemisinin] | % Activity |           |          |  |
|-------------------|------------|-----------|----------|--|
| -7.301            | 57.66129   | 91.93549  | 51.6129  |  |
| -7                | 184.0108   | 148.7805  | 105.4201 |  |
| -6.301            | 21.74985   | 43.93099  | 69.809   |  |
| -6                | 46.39557   | 136.3524  | 64.87985 |  |
| -5                | 34.95935   |           | 32.24932 |  |
| -4.301            | 36.93694   | -40.76577 | 44.81982 |  |

| Log [Artemisinin] | % Activity |          |           |  |
|-------------------|------------|----------|-----------|--|
| -8                | 168.5834   | 81.37803 | 53.21797  |  |
| -7                | 141.5032   | 100.5685 | 111.9393  |  |
| -6.301            | 100        | 61.65192 | 43.9528   |  |
| -5                | 68.66058   | 59.57669 | 58.6683   |  |
| -4.301            | 63.13364   | 10.9063  | -115.0538 |  |

**SERCA1 E255L**

| Log [Artemisinin] | % Activity |           |           |  |
|-------------------|------------|-----------|-----------|--|
| -8                | 155.1506   | 73.62363  | 157.5484  |  |
| -7                | 123.6635   | 101.8203  | 127.304   |  |
| -6.60206          | -9.598615  | 142.8864  | -15.95216 |  |
| -6.30103          | 92.05807   | 177.8309  | 9.462014  |  |
| -6                | 4.085939   | -46.26894 | 42.45156  |  |
| -5                | 18.08799   | 58.13386  | 112.7419  |  |

**PvSERCA**

| Log [Artemisone] | % Activity |           |           |  |
|------------------|------------|-----------|-----------|--|
| -12              | 76.088     | 62.69727  | 114.3472  |  |
| -11.3            | 87.29675   | 227.0325  | 122.8659  |  |
| -10.3            | 26.50974   | 207.5727  | -9.702844 |  |
| -10              | 88.91353   | -15.29933 | -6.430155 |  |
| -8.6             | -0.631076  | 30.06993  | -12.57036 |  |
| -5.3             | -87.61726  | 76.12144  | 13.01382  |  |

| Log [Artemisone] | % Activity |           |           |  |
|------------------|------------|-----------|-----------|--|
| -11.3            | 144.4551   | 113.2164  | 45.93296  |  |
| -10.3            | 91.39168   | 78.00095  | 85.6528   |  |
| -10              | 42.35033   | -33.03769 | 15.74279  |  |
| -9.6             | 64.85249   | 9.468527  | 105.3254  |  |
| -8.6             | 133.0285   | 39.02439  | -9.247968 |  |
| -6.6             | -11.73856  | 84.38063  | 67.55978  |  |

**PbSERCA**

| Log [Artemisone] | % Activity |        |        |  |
|------------------|------------|--------|--------|--|
| -8               | 100        | 163.9  | 97.22  |  |
| -7               | 69.234     | 41.384 | 49.217 |  |
| -6.3             | 63.53      | 47.098 | 24.499 |  |
| -6               | 155.56     | 66.67  | -77.78 |  |
| -5.4             | 19.626     | 67.49  | 51.828 |  |
| -4.3             | 69.697     | 84.078 | -16.59 |  |

| Log [Artemisone] | % Activity |       |         |  |
|------------------|------------|-------|---------|--|
| -9               | 218.8      | 4.3   |         |  |
| -8.6             | 106.34     | 55.58 | 50.5    |  |
| -7               | 100        | 87.06 | 48.22   |  |
| -6.12            | -12.9      | 55.58 |         |  |
| -5.4             | 41.75      | 41.75 | -42.4   |  |
| -4.3             | 10.14      | 91.3  | -204.35 |  |
